# Supplementary material for: Generalized Likelihood Uncertainty Estimation and Markov Chain Monte Carlo Simulation to Prioritize TMDL Pollutant Allocations
Source: Atypon-hosted journal article supplement (doi:10.1061/(asce)he.1943-5584.0001720), 2018-10-13
Supplement: supplemental_data_1943-5584.0001720_mishra.pdf [file supplemental_data_1943-5584.0001720_mishra.pdf]

## SUPPLEMENTAL DATA

*ASCE Journal of Hydrologic Engineering*

# Generalized Likelihood Uncertainty Estimation and Markov Chain Monte Carlo Simulation to Prioritize TMDL Pollutant Allocations

Anurag Mishra, Ebrahim Ahmadisharaf, Brian L. Benham, Mary Leigh Wolfe, Scotland C. Leman, Daniel L. Gallagher, Kenneth H. Reckhow and Eric P. Smith

**DOI:** 10.1061/(ASCE)HE.1943-5584.0001720

© ASCE 2018

[www.ascelibrary.org](http://www.ascelibrary.org)

## SUPPLEMENTAL DATA

**Table S1.** Monthly and land use adjustment factors of the uncertain parameters which vary according to the time of year

| Parameter        | Land Use            | Jan.             | Feb. | Mar.  | April | May  | Jun. | Jul. | Aug. | Sep. | Oct. | Nov. | Dec. |
|------------------|---------------------|------------------|------|-------|-------|------|------|------|------|------|------|------|------|
| UZSN             | Forest              | 1.0 <sup>a</sup> | 1.0  | 1.5   | 2.0   | 2.0  | 3.3  | 3.3  | 2.0  | 2.0  | 1.5  | 1.5  | 1.0  |
|                  | Cropland            | 0.3              | 0.3  | 0.5   | 1.3   | 2.0  | 2.7  | 2.7  | 2.0  | 1.3  | 0.5  | 0.3  | 0.3  |
|                  | Pasture             | 0.3              | 0.3  | 0.5   | 1.3   | 2.0  | 2.7  | 2.7  | 2.0  | 1.3  | 0.5  | 0.3  | 0.3  |
|                  | Others <sup>b</sup> | 0.3              | 0.3  | 0.3   | 0.5   | 1.0  | 1.5  | 1.5  | 1.0  | 0.5  | 0.3  | 0.3  | 0.3  |
| CEPSC            | Forest              | 1.0 <sup>a</sup> | 1.0  | 2.0   | 2.7   | 2.7  | 4.0  | 4.0  | 4.0  | 4.0  | 2.0  | 1.0  | 1.0  |
|                  | Cropland            | 1.0              | 1.0  | 1.3   | 1.3   | 2.0  | 2.7  | 4.0  | 4.0  | 4.0  | 2.7  | 2.0  | 1.0  |
|                  | Pasture             | 1.0              | 1.0  | 1.0   | 1.0   | 1.0  | 4.0  | 4.0  | 4.0  | 1.0  | 1.0  | 1.0  | 1.0  |
|                  | Others <sup>b</sup> | 1.0              | 1.0  | 1.0   | 1.0   | 1.0  | 1.0  | 1.0  | 1.0  | 1.0  | 1.0  | 1.0  | 1.0  |
| LZETP            | Forest              | 1.0 <sup>a</sup> | 1.0  | 1.3   | 1.7   | 2.0  | 2.3  | 2.3  | 2.0  | 1.7  | 1.3  | 1.0  | 1.0  |
|                  | Cropland            | 1.0              | 1.0  | 1.0   | 1.3   | 1.3  | 2.0  | 2.0  | 2.0  | 1.7  | 1.3  | 1.0  | 1.0  |
|                  | Pasture             | 1.0              | 1.0  | 1.0   | 1.3   | 1.3  | 2.0  | 2.0  | 2.0  | 1.7  | 1.3  | 1.0  | 1.0  |
|                  | Others <sup>b</sup> | 1.0              | 1.0  | 1.0   | 1.0   | 1.0  | 1.3  | 1.3  | 1.0  | 1.0  | 1.0  | 1.0  | 1.0  |
| ACQOP-<br>PERLND | Cropland            | 1.0              | 56.0 | 225.0 | 182.0 | 55.0 | 1.0  | 1.0  | 1.0  | 1.0  | 56.0 | 64.0 | 1.0  |

<sup>a</sup> Value for the forest land use for the January month is generated using the distribution and the value of all other months and land uses are generated using the factor.

<sup>c</sup> Other land uses include farmstead, LDR, HDR and loafing lot.
